# Supplementary material
Source: publisher site journal article supplement (https://en-cdn.bio-protocol.org/attached/file/20210322/3999%20Supplementary%20file%20Data%201%20s1.xlsx)
Supplement: Supplementary file 1 [file 3999%20Supplementary%20file%20Data%201%20s1.xlsx]

## Sheet: Sheet1
strain	virus	accession	date	region	country	state	city	division	db	segment	authors	url	title	journal	paper_url
hCoV-19/India/1-27/2020	Coronavirus	EPI_ISL_413522	2020-01-27	Asia	India	Kerala	Unknown	Indian Council of Medical Research - National Institute of Virology	GISAID	genome	Potdar V, Yadav PD, Choudhary ML, Shete-Aich A	https://www.gisaid.org/	GISAID SUBMISSION	GISAID SUBMISSION	https://www.gisaid.org/
hCoV-19/India/1-31/2020	Coronavirus	EPI_ISL_413523	2020-01-31	Asia	India	Kerala	Unknown	Indian Council of Medical Research - National Institute of Virology	GISAID	genome	Potdar V, Yadav PD, Choudhary ML, Shete-Aich A	https://www.gisaid.org/	GISAID SUBMISSION	GISAID SUBMISSION	https://www.gisaid.org/
